# Supplementary material for: Meioc-Piwil1 complexes regulate rRNA transcription for differentiation of spermatogonial stem cells
Source: eLife. 2025 Jul 24;14:RP104295. doi: 10.7554/eLife.104295 (PMC12289311; doi:10.7554/eLife.104295)
Supplement: Supplementary file 1. — Proteins in anti-Meioc IP sample with at least threefold enrichment in normal testes compared with control IgG IP sample, as detected by mass spectrometry. Uniprot IDs are shown in Accession. Proteins were classified with GO terms (http://amigo.geneontology.org). The molecular weight, number of peptides identified by spectrometry, and coverage are provided. Meioc protein is highlighted as red, and known mouse MEIOC partner YTHDC2 is indicated by bold. [file elife-104295-supp1.xlsx]

## Sheet: Sheet1
Supplementary file 1. LC/MS/MS for the immunoprecipitate (IP) of Meioc with lysate of a wild-type testis.
Proteins in anti-Meioc IP sample with at least 3-fold enrichment in normal testes compared with control IgG IP sample, as detected by mass spectrometry. Uniprot ID are shown in Accession. Proteins were classified with GO-terms (http://amigo.geneontology.org). The molecular weight, number of peptides identified by spectrometry, and coverage are provided. Meioc protein is highlighted as red, and kn…
Protein	Accession	Function	MW [kDa]		Normal testis
				Coverage	peptides
					cont. IgG	anti-Meioc
Nucleotide/ protein binding proteins; Transcription, RNA processing and translation regulation
Ythdc2	A0A0G2KIQ1	RNA processing	158.14	51.1	0	73
Meioc	E7FFE7	mRNA stabilization	95.2337	58.87	0	36
Rbm46	F1RBR1	mRNA stabilization	56.8413	15.1	0	6
Piwil1	Q8UVX0	piRNA metabolic process/ P granule	97.3887	6.64	0	5
Ruvbl2	A0A2R8QIK4	DNA helicase	50.3171	9.25	0	3
Heatshock protein
Hspa8	A0A0R4IMF8	Protein refolding	70.1019	41.32	0	22
Hspa8b	F1R9V3	protein folding	71.0493	19.47	0	11
Hspd1	Q803B0	Protein refolding	61.1579	31.13	0	11
Hspa9	F1QFC0	Protein refolding	73.906	6.89	0	4
Hspa5	Q6P3L3	Protein refolding	71.9462	6.77	0	3
motor protein
Myh11a	B3DFS9	actin filament-based movement	227.602	44.68	7	78
Myh10	I3ISA3	actin filament-based movement	231.02	19.18	0	30
Myh9b	F1QJK4	actin filament-based movement	203.274	19.99	0	26
Cytoskeleton related protein
Actbb	Q7ZVF9	cytoskeleton	41.7257	51.73	0	14
Acta2	Q6DHS1	cytoskeleton	41.9678	39.52	0	12
Signal transduction
Tfg	Q6P0G5	Signal transduction	42.2707	19.19	0	4
Other
Odf3b	A3KQA5	Unknown	27.8777	16.34	0	3
