# Supplementary material for: Meioc-Piwil1 complexes regulate rRNA transcription for differentiation of spermatogonial stem cells
Source: eLife. 2025 Jul 24;14:RP104295. doi: 10.7554/eLife.104295 (PMC12289311; doi:10.7554/eLife.104295)
Supplement: Supplementary file 2. — Proteins in anti-Meioc IP sample with at least threefold enrichment in the hyperplasia testis compared with control IgG IP sample, as detected by mass spectrometry. NCBI protein ID or Uniprot ID is shown in Accession. Proteins were classified with GO terms (https://amigo.geneontology.org/amigo). The molecular weight and number of peptides identified by spectrometry, and coverage are provided. Meioc protein is highlighted as red. *: protein recorded in RNA Granule Database as processing body (P-body) protein, **: protein recorded in RNA Granule Database as stress granule protein (Youn JY, Dunham WH, Hong SJ, Knight JDR, Bashkurov M, Chen GI, Bagci H, Rathod B, MacLeod G, Eng SWM, et al. 2018. High-Density Proximity Mapping Reveals the Subcellular Organization of mRNA-Associated Granules and Bodies. Mol Cell 69: 517-532. doi: 10.1016/j.molcel.2017.12.020). [file elife-104295-supp2.xlsx]

## Sheet: Sheet1
Supplementary file 2. LC/MS/MS for the immunoprecipitate (IP) of Meioc with lysate of a hyperplasia testis in which SSCs accumulate.
Proteins in anti-Meioc IP sample with at least 3-fold enrichment in normal testes compared with control IgG IP sample, as detected by mass spectrometry. NCBI protein ID or Uniprot ID are shown in Accession. Proteins were classified with GO-terms (http://amigo.geneontology.org). The molecular weight and number of peptides identified by spectrometry, and coverage are provided. Meioc protein is high…
Protein	Accession	Function	MW [kDa]		Hypertrophied testis
				Coverage	peptides
					cont. IgG	anti-Meioc
Nucleotide/ protein binding proteins; Transcription, RNA processing and translation regulation
Tdrd6	F1R237	protein binding/ P granule	236.362	36.7	5	63
Ythdc2*	A0A0G2KIQ1	RNA processing	158.14	45.72	0	56
Cnot1*,**	A1A5H6	poly(A)-specific ribonuclease activity	266.433	28.85	0	50
Edc4*,**	A5PN03	deadenylation-independent decapping of nuclear-transcribed mRNA	149.278	50.84	3	50
Piwil1	Q8UVX0	piRNA metabolic process/ P granule	97.3887	55.71	11	39
Dhx9*,**	B0S6Z1	RNA processing, protein localization to cytoplasmic stress granule	139.92	29.58	1	31
Tdrd1	F1Q7S6	protein binding/ P granule	129.083	41.07	1	30
Xrn1*,**	F1Q4U5	5'-3' exonuclease activity	190.822	20.62	0	26
Meioc	E7FFE7	mRNA stabilization	95.2337	37.84	0	24
Ddx4	O42107	RNA binding/ P granule	76.9566	42.18	5	24
Tdrd7a*,**	F1QTF8	RNA binding/ P granule	121.349	28.73	0	23
Pabpc1b*,**	Q6P3L1	RNA binding	70.9796	45.58	2	18
Elavl2*,**	Q6GQM6	mRNA 3'-UTR binding	39.448	50.56	3	18
Marf1*	A4QNR9	RNA binding	150.631	15.28	0	17
Pabpc1a*,**	F1QB54	RNA binding	70.6885	43.53	2	17
Rbm46	F1RBR1	mRNA stabilization	56.8413	36.27	0	13
Aqr**	F1QQV6	RNA binding	176.428	11.42	0	13
Pabpc1l	Q6TGY6	RNA binding /mRNA polyadenylation	68.9253	29.35	0	12
Tdrd9	B8A4F4	RNA/protein binding/ piP-body	150.716	12.15	0	12
Cpeb1*,**	Q9YGX5	mRNA 3'-UTR binding	62.2153	33.81	0	12
Ddx19b	B3DFU8	mRNA export from nucleus /RNA binding	53.3062	36.09	1	12
Adad2	A0A1D5NSL4	adenosine deaminase activity	57.0012	28.43	0	11
Ddx3xb**	F1RCB2	mRNA 5'-UTR binding/ DNA binding/ P granule	75.7855	18.02	0	10
Lsm14b*,**	A8E580	RNA binding	41.484	42.63	1	9
Stau2*,**	A0A2R8RW72	RNA binding	62.5145	18.9	0	8
Ddx6*,**	E7FD91	RNA-binding	53.8761	21.49	0	7
Piwil2**	A2CEI6	piRNA biosynthetic process/ P granule	116.133	9.94	0	7
Zar1	A7MCC1	mRNA binding/ protein binding	38.2761	18.24	1	7
Cnot9*	Q6NWL4	CCR4-NOT complex/ P body	33.3347	24.16	0	6
Hnrnpa1a**	E7FAQ8	ribonucleoprotein complex	38.5075	18.04	0	6
Adar**	E9QIW2	RNA processing	151.307	5.87	0	6
Rbm45	B0S522	RNA binding	52.052	11.56	0	5
Tardbpl	X1WD19	nucleic acid binding	43.8629	17.21	0	5
Ddx1**	F1R3T3	nucleic acid binding	81.7554	10.76	0	5
Stk31	E7F7Y8	protein kinase activity/ RNA catabolic process	77.0326	8.11	0	5
Hnrnpa0l	Q6P113	RNA binding	31.6679	31.77	1	5
Dazl **	I3ITB8	mRNA binding	17.1097	26	0	4
Tardbp**	Q802C7	nucleic acid binding	44.3991	11.17	0	4
Pabpn1l	E9QBX4	RNA binding	18.8591	31.48	0	4
Stau1**	F1QTC1	RNA binding	69.7423	7.7	0	4
Ddx43	B8A609	RNA binding	78.8137	6.82	0	4
Hnrnpul1**	Q1L9A1	RNA processing	88.9069	7.14	0	3
Hnrnpa0b	Q6PHJ4	3'-UTR-mediated mRNA stabilization	31.9694	15.51	0	3
Igf2bp3*,**	Q9PW80	mRNA 3'-UTR binding	63.3122	8.42	0	3
Hnrnpdl**	Q7SXN2	RNA binding	33.2329	12.16	0	3
Hnrnpabb**	Q6NYA1	nucleic acid binding	34.2273	10.68	0	3
Cnot2*	A4QN63	negative regulation of translation	57.0656	9.23	0	3
Elavl1a*,**	Q7ZTS8	RNA binding	35.914	13.89	0	3
Sf3b3	Q1LVE8	RNA splicing	135.536	3.53	1	3
Poldip3	A0A0R4IDS3	RNA binding	48.9246	10.68	1	3
Heatshock protein
Hspa8b	F1R9V3	protein folding	71.0493	21.79	0	13
Hspa9**	F1QFC0	Protein refolding	73.906	11.44	1	6
hsp90ab1	O57521	Protein refolding	83.305	6.76	0	4
Hspa5**	Q6P3L3	Protein refolding	71.9462	6.31	0	3
Translational regulation
Eef1a	Q92005	translational elongation	50.0161	40.69	4	14
Nars	B8A5D3	tRNA aminoacylation for protein translation	63.784	9.17	0	4
Paip1	Q6DBW2	translation activator activity	46.6354	16.23	0	3
Protein metabolism
Usp9	Q4FE55	hydrolase activity	290.061	13.41	0	26
Ubc	F1QHN6	protein ubiquitination	59.9374	61.73	0	4
Herc2	E7EYK8	ubiquitin-protein transferase activity	528.228	1.2	0	4
Psmd6	F1QZA5	proteasome regulatory particle	45.2984	10.36	0	3
motor protein
Myh11a	B3DFS9	actin filament-based movement	227.602	68.54	48	166
Myh9a	F8W3L6	actin filament-based movement	227.582	66.14	42	146
Myo6a**	F1Q6Q6	actin filament-based movement	144.879	53.79	8	65
Myo6b**	Q6B335	actin filament-based movement	145.298	43.98	6	50
Myh14	E7FGF6	actin filament-based movement	232.183	19.54	9	33
Myo5aa*	A0A0R4IXQ5	actin filament-based movement	210.966	21.71	0	31
Myo1cb*	R4GDM7	actin binding	118.297	30.35	0	27
Myo5b	A0A286YAD0	actin binding	209.644	17.66	0	24
Myo1b	F1R617	actin filament-based movement	127.953	13.19	0	14
Myo1d*	E7F9L8	actin filament binding	115.812	11.35	0	11
Myl12.1	Q6PHJ8	actin filament binding	19.8326	62.21	0	9
Myl9b	Q6NVA6	actin filament binding	19.8274	61.85	0	9
Myl9a	F1QYK9	actin filament binding	19.9825	61.49	0	8
Myl12.2	B3DKC6	calcium ion binding	19.7965	50.58	0	8
Myo7aa	B3DJQ7	motor protein or motor activity or actin binding	251.532	4.73	0	7
Myo5ab*	F8W4A0	motor protein or motor activity or actin binding	138.164	5.53	0	5
Myo5c	E7FCI5	motor activity	201.754	4.24	0	5
Myo1c*	A5PF48	motor activity	117.989	6.14	0	5
zgc:103670	F1RAK1	microtubule-based movement	82.0079	9.32	0	5
Si:dkeyp-86b9.1	E7FGT8	microtubule-based movement	531.229	0.86	0	4
Dynll2b**	Q5BL99	dynein complex	10.3571	26.97	0	3
Myo1f	B0S6F2	motor activity	125.852	3.38	0	3
Dnah6	E9QH47	microtubule-based movement	452.292	0.91	0	3
Kif2c	A9JRA8	microtubule-based movement	76.927	4.93	0	3
Dnah7	F1Q8L1	microtubule-based movement	456.146	0.77	0	3
Dnah2	E7EZB9	microtubule-based movement	501.342	1.23	0	3
Kif18a**	B0V302	microtubule motor activity	100.915	5.03	0	3
Myl1	Q6P0G6	myosin complex	20.9184	26.32	0	3
Protein/ RNA transport
Cltcb	E9QBV1	intracellular protein transport	191.515	25.52	4	33
Seh1l	Q6TGU2	GATOR2 complex	39.7915	39.01	0	8
Sec13	AAQ97847.1	GATOR2 complex	39.7775	39.01	0	8
Mios	A0A0G2KK88	GATOR2 complex	84.8574	12.9	1	8
Kpnb1**	A0A0R4IMZ8	NLS-bearing protein import into nucleus	97.4051	9.82	0	7
Actr3	Q4V9L1	actin filament organization	45.7151	25.19	0	7
Nup155	F1Q953	structural constituent of nuclear pore	155.033	5.61	0	5
Nup88	A2CEI4	nucleocytoplasmic transport	80.8097	6.94	0	4
Nup93	Q1LV08	structural constituent of nuclear pore	93.0656	7.32	0	4
Ndc1	B0S5I6	nuclear pore transmembrane ring	74.4093	9.69	0	3
Nup205 **	F1QJ18	structural constituent of nuclear pore	220.074	1.83	0	3
Nup214	A0A0H2UKK7	structural constituent of nuclear pore	126.929	3.82	0	3
Rangap1a	Q08BV5	GTPase activator activity	61.9752	8.07	0	3
Amino acid/ carbohydrate/ lipid metabolic protein
Glud1b	Q6P3L9	glutamate dehydrogenase (NAD+) activity	59.9394	37.64	0	16
Glud1a	B8A4B0	glutamate dehydrogenase (NAD+) activity	60.1035	21.88	1	10
Tktb	B2GRK9	transketolase activity	67.9625	18.24	1	7
Cratb	A0A0R4ILX2	transferase activity	68.2488	14.86	1	6
Mthfd1b**	F1QXP5	methylenetetrahydrofolate dehydrogenase (NADP+) activity	100.458	10.39	1	5
Cytoskeleton related protein
Tuba1c**	A0A2R8RZK5	cytoskeleton	48.503	52.41	0	21
Tuba1c**	Q6DC49	cytoskeleton	50.0344	50.44	0	20
Tuba8l	Q6TNP9	cytoskeleton	50.0025	46.77	0	18
Acta2	Q6DHS1	cytoskeleton	41.9678	45.62	0	17
Sept7a	A0A096X788	GTP binding	50.448	36.55	0	16
Gsna	F1QUM3	barbed-end actin filament capping	80.5736	31	2	16
Sept8a	F1QJK2	GTP binding	48.9818	34.52	0	13
Wdr90	F1RA29	protein binding	202.182	9.55	0	13
Tpm4a	Q7T3F0	actin filament binding	28.4844	42.74	1	12
Tpm3	A0A2R8RR81	actin filament binding	28.7038	42.74	1	11
Tmod2	F1QJZ6	protein binding/ tropomyosin binding	38.7721	32.85	0	9
Pcm1	F8W5U4	protein binding	223.551	7.1	0	9
Tpm4b	Q7SXW1	actin filament binding	28.7137	27.02	0	8
Tekt1	A0A0R4IRF0	microtubule cytoskeleton/ cilium assembly	47.0101	23.13	0	7
Actr3	Q4V9L1	actin filament organization	45.7151	25.19	0	7
Sept7b	B8A5M2	GTP binding	18.4548	56.52	0	6
Sept8b	A4FUM1	microtubule cytoskeleton / GTP binding	49.0677	12.77	0	6
Sept6	Q6PHD7	microtubule cytoskeleton/ GTP binding	48.9249	13.11	0	5
Efhc1	F1Q8A4	mitotic spindle organization	64.1112	16.61	0	5
Eppk1**	I3ISA6	cytoskeleton	611.34	13	0	5
Efhc2	B8A5Q4	microtubule	85.505	7.35	0	5
Dock7	F1Q8Z1	microtubule cytoskeleton organization	241.553	3.57	0	5
Actr2a	F1QF15	cytoskeleton	44.6651	13.45	0	4
Saxo2	Q2YDR1	microtubule binding	53.8277	10.58	0	4
Arpc4l	Q6NZZ2	cytoskeleton	19.6653	21.43	0	4
Rsph4a	A2CET1	axoneme assembly	58.5294	12.02	0	4
Cfap58	F1QGB9	cilium	104.638	5.08	0	3
Cfap45	A0A2R8Q6T6	Rab GTPase binding	64.4384	5.89	0	3
Cfap57	F8W3G5	cilium-dependent cell motility	75.2018	4.94	0	3
Wdr66	A3QK38	cilium movement	101.583	4.42	0	3
Signal transduction
Camk2b1	E9QDQ2	protein kinase activity	59.1901	31.45	0	12
Camk2g2	A0A2R8PWY6	protein kinase activity	51.9314	28.82	0	10
Tfg	Q6P0G5	Signal transduction	42.2707	29.8	0	8
Camk2d1	A0A2U3TVF6	protein kinase activity	55.7923	14.66	0	6
Camk2g1	U3JAY8	protein kinase activity	35.8107	29.05	0	6
Cpne3	A0A0R4IUW1	ERBB2 signaling pathway	59.8171	5.08	0	3
Immune system
C3	F1QYN0	complement binding	181.955	58.25	27	86
C3a	F1QLN6	complement binding	90.5643	30.06	4	22
Cfbl	A0A2R8QKR9	hydrolase activity	84.3681	18.77	0	12
Mxf	F1R785	GTP binding/ microtubule binding	73.4496	14.4	0	8
Cfp	B0S697	complement activation	48.224	16.48	0	6
Extracellular matrix
Muc2	A0A0G2L8S7	proteinaceous extracellular matrix	165.193	34.73	3	34
Mfap4	F8W539	microfibril	27.8752	17.48	0	3
Other
Rnf17	F1R3C5	zinc ion binding	170.94	24.92	2	27
Olfm4l	A0A0R4IYB5	Unknown	51.9257	30.04	0	11
Stom	O93423	integral component of plasma membrane	31.5847	26.76	0	6
Glg1a	X1WHY3	golgi membrane	129.015	6.55	0	6
Ppp2r1bb**	Q642H5	protein phosphatase type 2A complex	65.117	16.64	0	6
Mthfd1b**	F1QXP5	methylenetetrahydrofolate dehydrogenase (NADP+) activity	100.458	10.39	1	5
Aldh2.1	A2BGR9	oxidoreductase activity	56.5035	11.82	0	4
Ckba	Q08BV6	kinase activity	42.8388	15.22	0	4
Parp12a**	B5DDZ3	NAD+ ADP-ribosyltransferase activity	75.4584	7.09	0	4
Gys1	Q7SYB8	glycogen (starch) synthase activity	80.4221	7.86	0	4
Tmem209	F6P528	integral component of membrane	61.8072	11.21	0	4
Ak9	A0A2R9YJL3	kinase activity	202.726	2.44	0	4
Mxe	Q800G5	mitochondrial membrane	70.3512	5.92	0	3
Flot2a	Q98TZ8	cell adhesion	46.8915	7.48	0	3
Itln1	A0A2R8QEW4	carbohydrate binding	34.1152	15.08	0	3
Ctbp1	Q7ZU55	NAD binding	48.4419	9.8	0	3
Txndc5	Q6PFL9	isomerase activity	37.3162	13.46	0	3
Si:dkey-208k4.2	A0A0R4IN01	nucleic acid binding	34.8338	10	0	3
Unknown
Si:zfos-2330d3.7	R4GEQ7	unknown	27.7743	24.28	0	5
Si:ch211-103b1.2	A0A2R8PW86	unknown	77.5182	8.43	0	4
Zgc:154086	Q08BA5	unknown	122.527	5.24	0	4
Mvp	Q6P3L0	unknown	96.47	4.75	0	3
Acot9.1	A0A2R8QMR4	unknown	47.4751	8.89	0	3
Lrch3	A0A2R8QI82	unknown	80.0658	5.22	0	3
Si:ch211-189e2.3	A0A286YB87	unknown	199.364	2.08	0	3
Flot1b	Q6TH07	unknown	47.1783	8.94	0	3
Fam166b	A0A0R4I9Q0	unknown	33.3239	15.72	0	3
