# Supplementary material for: Meioc-Piwil1 complexes regulate rRNA transcription for differentiation of spermatogonial stem cells
Source: eLife. 2025 Jul 24;14:RP104295. doi: 10.7554/eLife.104295 (PMC12289311; doi:10.7554/eLife.104295)
Supplement: Supplementary file 3. — *: Primer set to amplify upstream of rhodopsin locus (Morley RH, Lachani K, Keefe D, Gilchrist MJ, Flicek P, Smith JC, Wardle FC. 2009. A gene regulatory network directed by zebrafish. No tail accounts for its roles in mesoderm formation. Proc Natl Acad Sci 106: 3829–3834. doi: 10.1073/pnas.0808382106). [file elife-104295-supp3.xlsx]

## Sheet: Primers
Supplementary file 3. Oligonucleotide primers snd sgRNA used in this study
	Forward	Reverse
<Construction of Meioc and Ythdc2 expression vector for antibody production>
meioc (for restriction enzyme cloning with BamHI and KpnI)	TTAGGATCCATGGAGGGTAACGTTAATAATGC	TATGGTACCCTCTAAAAGGTTGCGGGTCA
ythdc2 (for DNA assembly cloning)	ATGGGTCGCGGATCCGAATTCTTCCTGCGGCGGATCCGCTC	GTGGTGGTGGTGGTGCTCGAGCAATTTCTCCCACAGCTGCA
<cRNA probe synthesis for in situ hybridization >
5S rRNA	CCATACCACCCTGAACACG	AAGCTTACAGCACCTGGTATTC
5.8S rRNA	GTCGATGAAGAACGCAGCTA	CAAAGTGCGTTCGAAGTGTC
18S rRNA	CCTGCGGCTTAATTTGACTC	ATGCCAGAGTCTCGTTCGTT
28S rRNA	CCTGCCCTTCACAAAGAAAA	AAAGGGAGTCGGGTTCAGAT
meioc	ACCCATTTCTGGATTTCCATC	TGTGATTCATTTCTGCTGCTG
<qRT-PCR >
5’ETS-18S rRNA	TCTCTTCCTCTACCACTCTGCTC	GCCGTGTGCACTTAGACCT
5S rRNA	CCATACCACCCTGAACACG	AAGCTTACAGCACCTGGTATTC
5.8S rRNA	GTCGATGAAGAACGCAGCTA	CAAAGTGCGTTCGAAGTGTC
18S rRNA	CCTGCGGCTTAATTTGACTC	ATGCCAGAGTCTCGTTCGTT
28S rRNA	CCTGCCCTTCACAAAGAAAA	AAAGGGAGTCGGGTTCAGAT
R2	AAAGCTCGGTCGAGGAGCC	GGCAGGATCACCACCACT
gapdh	TTCTCACAAACGAGGACACAA	GTCAAGAAAGCAGCACGGGT
<Construction of Meioc, Piwil1, Ythdc2 expression vector>
meioc (for restriction enzyme cloning with NotI and SalI)	CCCGCGGCCGCCCACCATGGAGGGTAACGTTAATAATGC	CCCGTCGACCAGGGTAGTCTGTGATCTCTC
meioc-ΔCC (for self DNA assembly)	AGCTTGGCAAAGCACTTGGAACAAGCAGTTACCAAGAGG	TCCAAGTGCTTTGCCAAGCT
piwil1 (for restriction enzyme cloning with EcoRI and SalI)	GGGGAATTCCCACCATGACAGGACGAGCAAGAGC	GGGGTCGACCAGGTAATACAGGAAGTCATC
ythdc2 (for restriction enzyme cloning with EcoRI and SalI)	CCCGAATTCGACATGATCAAGTACAAGAAGGAG-	CCCCTCGAGCAGGTCCACCTTCTCGTCAT
hp1α (for DNA assembly cloning into pFLAG-CMV-5a)	ATCTGCAGGATATCACCACCATGGGAAAGAAGAGCCAGA	ATCGGTACCGGATCCCACCGCTGTGGCACTCTTCT
hp1α (for DNA assembly cloning into pet21a)	TCCGAATTCGAGCTCGGAAAGAAGAGCCAGAACCG	TGGCGGCCGCAAGCTTCACCGCTGTGGCACTCTTCT
<Bisulfite sequence priemr>
R1271-R3182	GATTGGAGTAGATTAAGATTGGTAA	AAATATTAAAAACTTATCTTAAAACCACCA
R3185	GTTTTTTGTTTTTTGTTTATGGGTG	CCCTCCTCTCTCTTTCTTACAAAATA
<cRNA probe synthesis for northern blot analysis>
5’ETS	GGGGTAATACGACTCACTATAGGGCGTGGTTTTCAGCACTTGTTGG	GGGAATTAACCCTCACTAAAGGGAGTTGTGGTCACCGGGAAAT
ITS1	GGGGTAATACGACTCACTATAGGGCGCTCGGAAAACGGTGAACCT	GGGAATTAACCCTCACTAAAGGGACACCACAAAGAGGATGTTGG
7SL	GGGGTAATACGACTCACTATAGGGCGCAAGCTACTGGGAGGCTGAG	GGGAATTAACCCTCACTAAAGGGATGTATTACTCAGGCTGCAC
<ChIp-qPCR>
P1	GATGGTGGGTCTTATCTTGCTC	CTTACAGGGTGAGCTGAATCG
P2	GCGCATGACTTTCCTGTTCT	TCTGTCTCTCCCTCCCTTCC
P3	CTCACCTCAGCAGGAACGAC	GTAAGTTCCCATCGGTCAGGTGA
P4	CCTGCGGCTTAATTTGACTC	ATGCCAGAGTCTCGTTCGTT
rhod (rhodopsin)*	GACTCCACACAATCTGCAACAT	ACCACCTACGCTAAAGAAACCA
<single-guide RNA sequence>
ythdc2 sgRNA	GGGCTGGGGGAGACCGGCTCGTTTTAGAGCTAGAAATAGCAAGTTAAAATAAGGCTAGTCCGTTATCAACTTGAAAAAGTGGCACCGAGTCGGTGCTTTT
*: Primer set to amplify upstream of rhodopsin locus (Morley RH, Lachani K, Keefe D, Gilchrist MJ, Flicek P, Smith JC, Wardle FC. 2009. A gene regulatory network directed by zebrafish No tail accounts for its roles in mesoderm formation. Proc Natl Acad Sci 106: 3829–3834. doi: 10.1073/pnas.0808382106).
