# Supplementary material for: Meioc-Piwil1 complexes regulate rRNA transcription for differentiation of spermatogonial stem cells
Source: eLife. 2025 Jul 24;14:RP104295. doi: 10.7554/eLife.104295 (PMC12289311; doi:10.7554/eLife.104295)
Supplement: Supplementary file 4. [file elife-104295-supp4.xlsx]

## Sheet: Antibodies
Supplementary file 4. Antibodies and reagents used in this study
Name	Species	Conjugated fluorophore or enzyme	Supplier	Catalog #	Reference
<Primary antibodies >
Meioc	Rat				This paper
Ythdc2	Rabbit				This paper
Ddx4	Rabbit		GeneTex	GTX128306
Ddx4	Rabbit	Fluorescein (Fluorescein labeling kit – NH2 (Dojindo))	GeneTex	GTX128306	Houwing et al., 200718
Piwil1	Rabbit				Houwing et al., 200718
Piwil2	Rabbit				Houwing et al., 200832
Tdrd1	Rabbit				Huang et al, 201130
Tdrd6	Rabbit				Roovers et al., 201831
HP1α/Cbx5	Rabbit		Cusabio technology	CSB-PA004601HA01HU
Setdb1	Rabbit		ProteinExpress	MKA0067AF
α-Tubulin	Mouse		Sigma	T9026
Plzf	Rabbit				Ozaki et al., 201116
Sycp1	Rat				Saito et al., 201417
Sycp3	Rabbit				Ozaki et al., 201116
Flag	Mouse		Sigma	F3165
Fibrilarin	Mouse		Abcam	ab4566
PH3	Mouse		Abcam	ab14955
Rpl15	Rabbit		Aviva systems Biology	ARP65141_P050
BMP-2	Mouse		R&D systems	208301
GFP	Mouse		Santa Cruz Biotechnology	sc-9996
DIG (for detection of rRNAs by NBT/BCIP coloration )	Sheep	Alkaline phosphatase	Roche	11093274910
DIG (for fluoresence detetction of 28S rRNA)	Sheep	Rhodamine	Roche	11207750910
<Secondary antibodies >
Rat IgG	Goat	Alexa Fluor 488	Thermo Fisher Scientific	A-11006
Rat IgG	Goat	Alkaline phosphatase	Santa Cruz Biotechnology	sc-2071
Rabbit IgG	Donkey	Alexa Fluor 488	Jackson ImmunoResearch Laboratories	711-545-152
Rabbit IgG	Donkey	Alexa Fluor 594	Jackson ImmunoResearch Laboratories	711-585-152
Rabbit IgG	Bovine	Alkaline phosphatase	Santa Cruz Biotechnology	sc-2376
Mouse IgG	Goat	Alexa Fluor 594	Thermo Fisher Scientific	A11032
Mouse IgG	Goat	Alkaline phosphatase	Santa Cruz Biotechnology	sc-2008
Rat IgG	Goat	Horseradish peroxidase	Santa Cruz Biotechnology	sc-2065
Rabbit IgG	Goat	Horseradish peroxidase	Thermo Fisher Scientific	A27036
Mouse IgG	Goat	Horseradish peroxidase	Santa Cruz Biotechnology	sc-2005
<Reagent >
Histofine SAB-AP kit (for detection of Plzf)			Nichirei Biosciences	414032
TSA biotin system (for detection of meioc mRNA with Streptoavidin-Alexa Fluor 568 and for fluorescence detection of Meioc in 1-2 cell spermatogonia wuth Streptoavidin-Alexa Fluor 488)			Akoya Biosciences	NEL700A001KT
Streptavidin, Alexa Fluor™ 568 conjugate			Thermo Fisher Scientific	S11226
Streptavidin, Alexa Fluor™ 488 conjugate			Thermo Fisher Scientific	S11223
NBT/BCIP Stock Solution (for detection Alkaline phosphatase activity)			Roche	11681451001
TOTO-3 (for nuclear staining)			Thermo Fisher Scientific	T3604
DAPI (for nuclear staining)			Thermo Fisher Scientific	62248
