# Supplementary figures and images for: Meioc-Piwil1 complexes regulate rRNA transcription for differentiation of spermatogonial stem cells
Source: eLife journal article supplement (doi:10.7554/elife.104295), 2025-01-22

5'ETS

ITS1

7SL

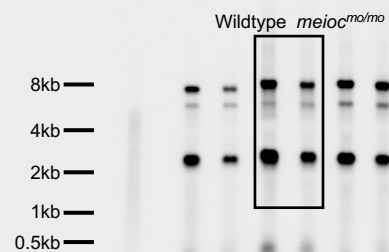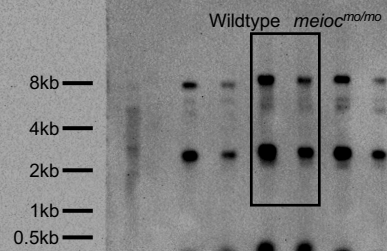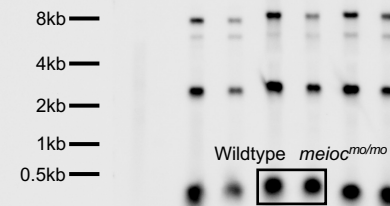

**Figure 2-source data 1.** Original membranes corresponding to Figure 2, panel F.

Supplement: fig2-data1 [file elife-104295-fig2-data1-v2.zip]

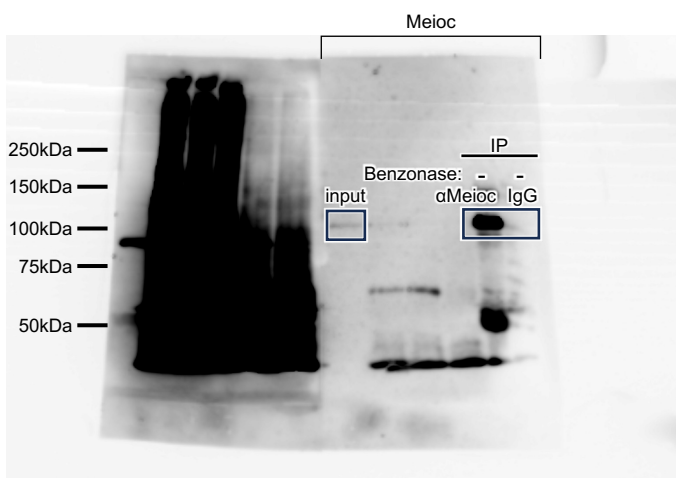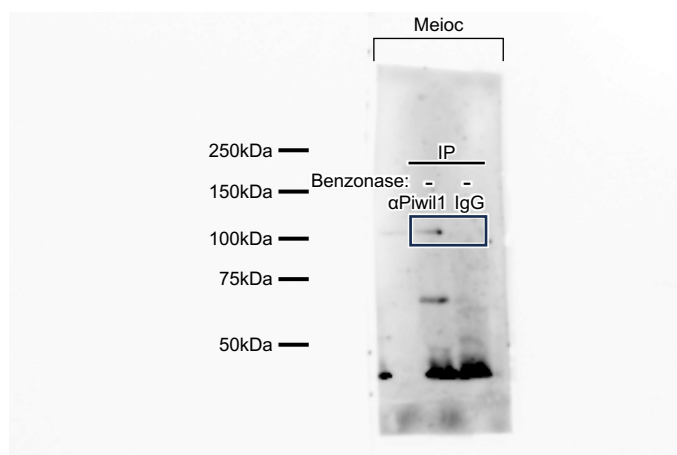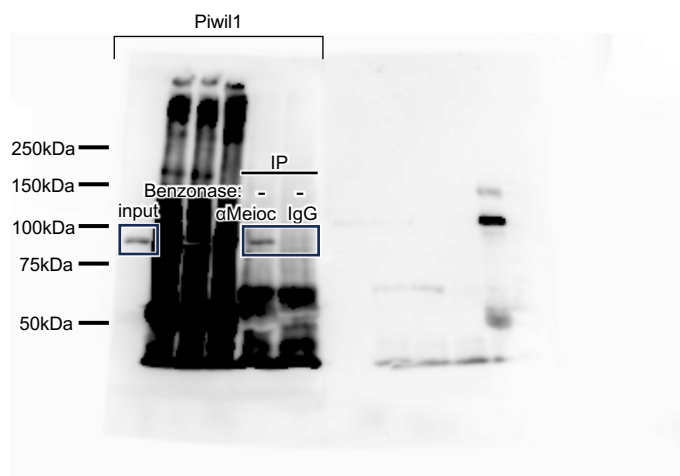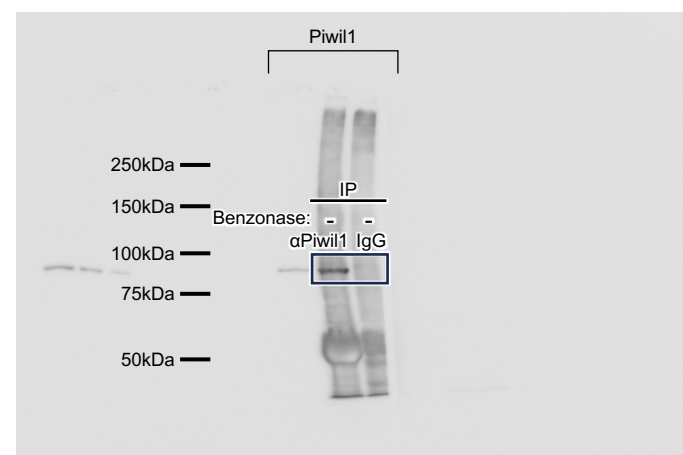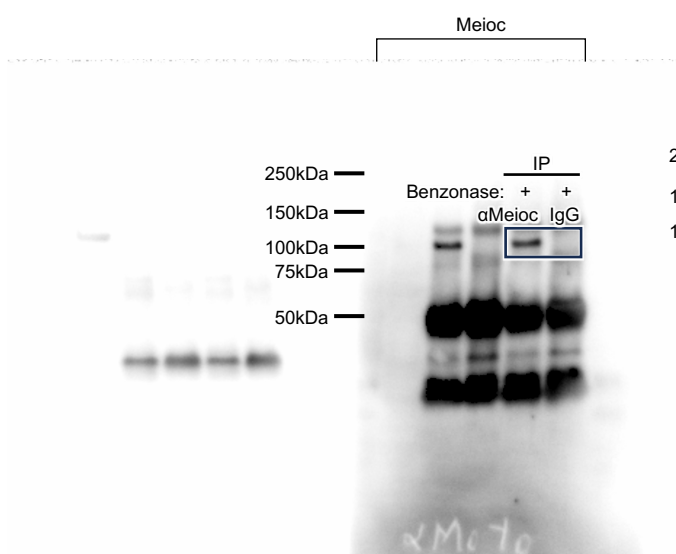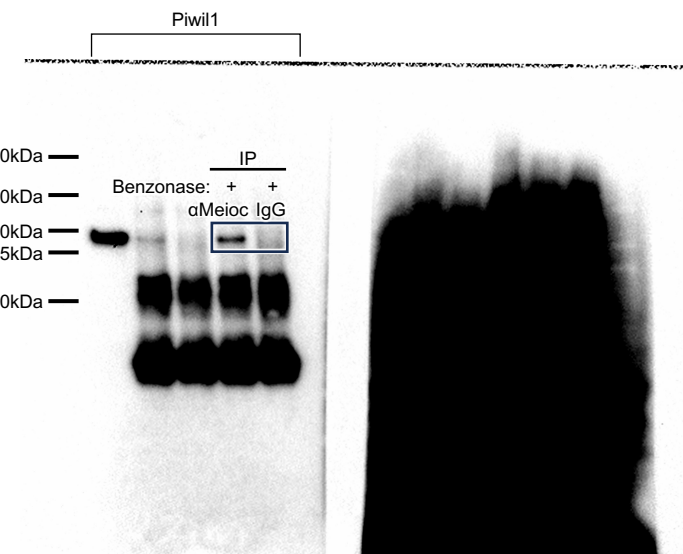

**Figure 4-source data 1.** Original membranes corresponding to Figure 4, panel D.

Supplement: fig4-data1 [file elife-104295-fig4-data1-v2.zip]

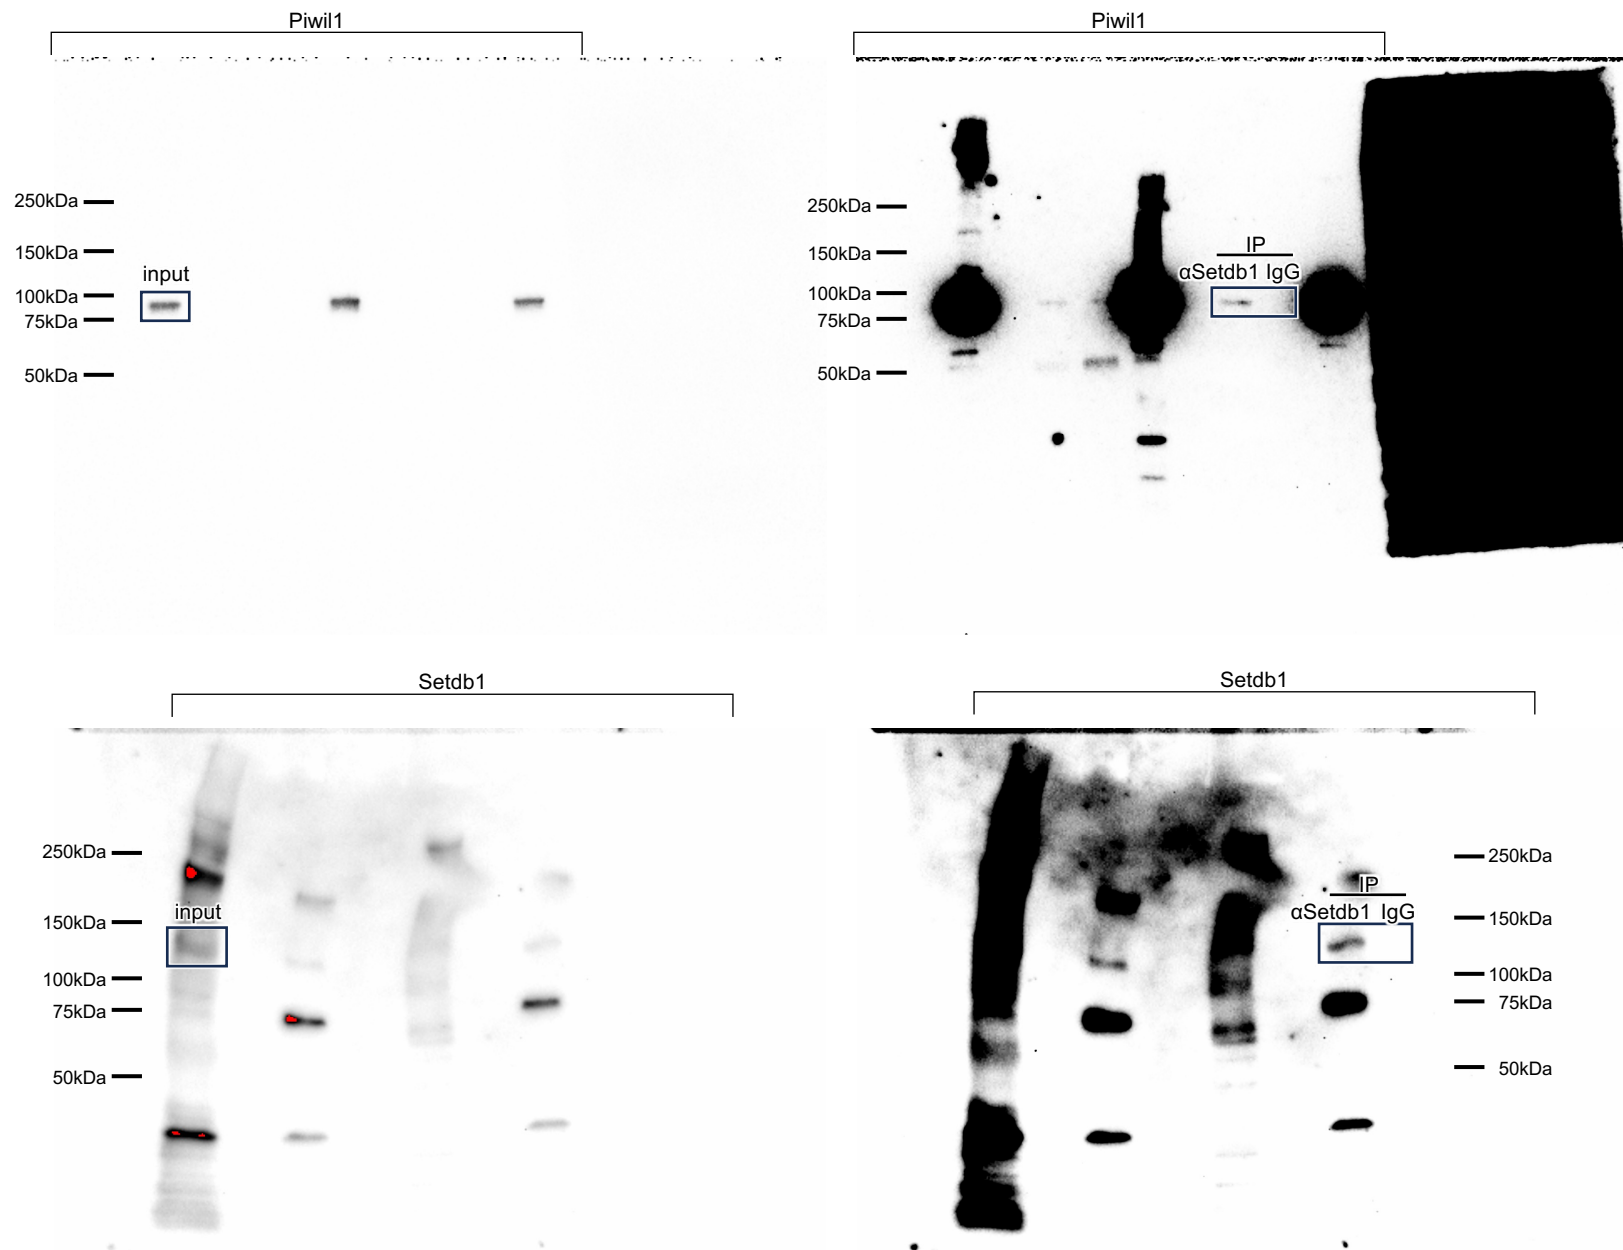

**Figure 6-source data 1.** Original membranes corresponding to Figure 6, panel D.

Supplement: fig6-data1 [file elife-104295-fig6-data1-v2.zip]

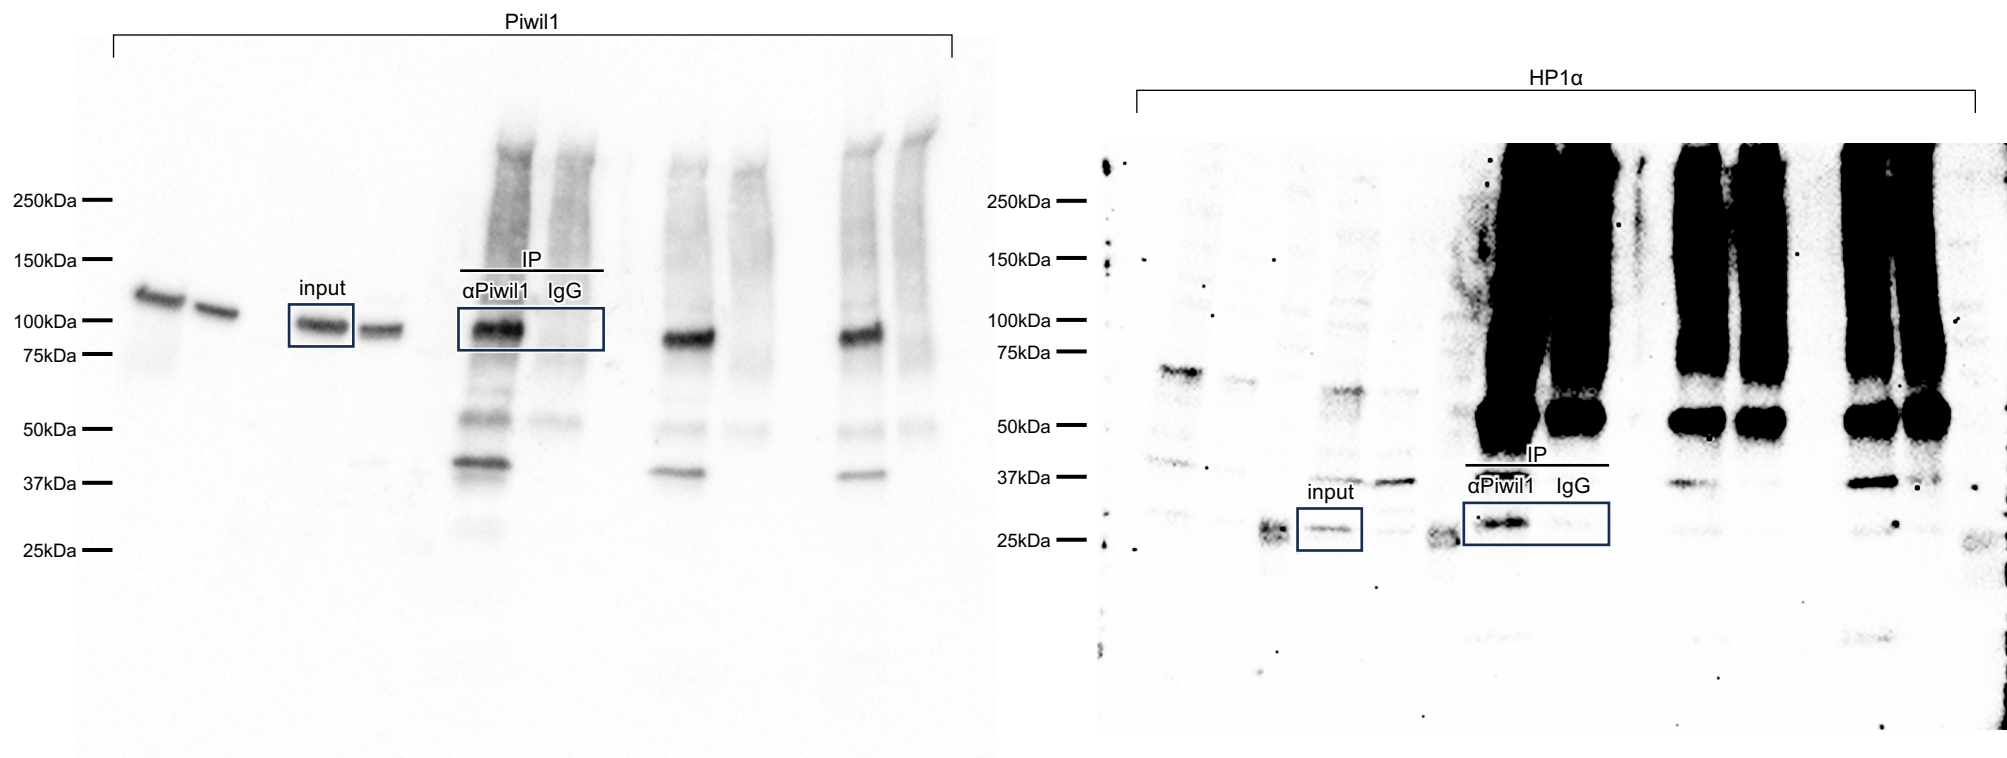

**Figure 6-source data 2.** Original membranes corresponding to Figure 6, panel I.

Supplement: fig6-data2 [file elife-104295-fig6-data2-v2.zip]
